# Supplementary material for: IL-10 Signaling Blockade Controls Murine West Nile Virus Infection
Source: PubMed Central journal article supplement (PMC2749443; doi:10.1371/journal.ppat.1000610), 2009-10-09

WNV Antigen+CD11b+MAP2

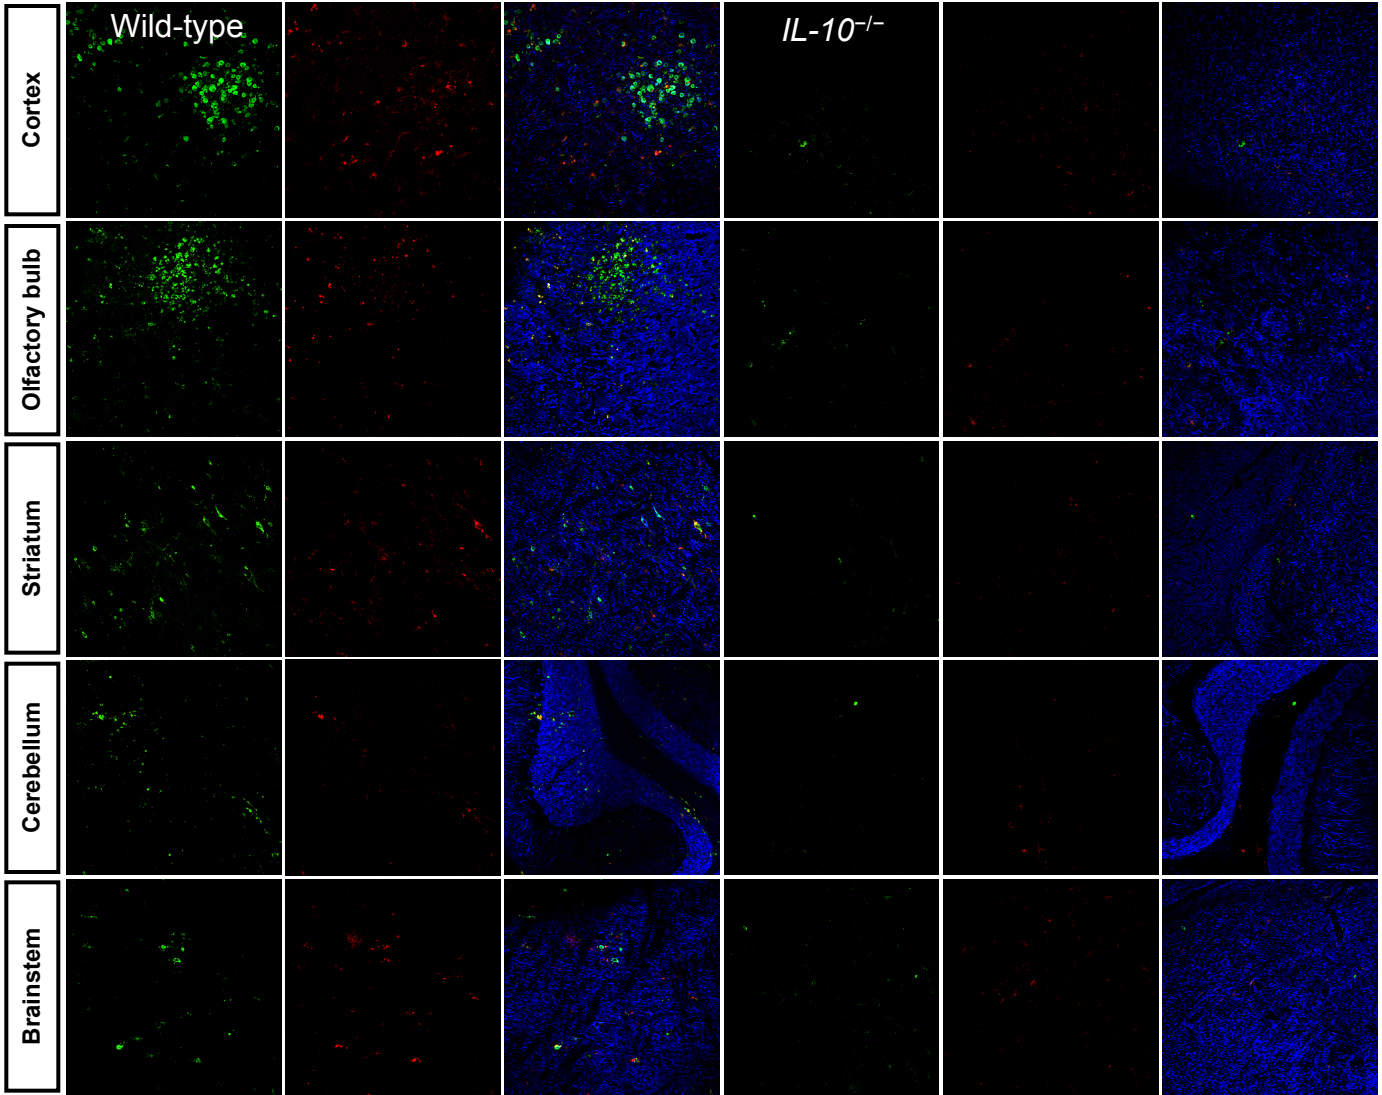

Supplement: ppat.1000610.s001.pdf [file ppat.1000610.s001.pdf]
